# Supplementary material
Source: publisher figshare collection journal article supplement (https://sage.figshare.com/ndownloader/files/11776130)
Supplement: Supplementary file [file 11776130]

**SUPPLEMENTARY INFORMATION**

**Supplementary Table 1. Hemostatic treatment administered to patients with thromboembolic events**

**(in all seven cases, the thromboembolic events were considered as possibly related to study medication).**

|                   | <b>Cohort</b> | <b>Surgical procedure(s)</b>                                                            | <b>Study treatment</b>               | <b>Thrombo-embolic event</b>       | <b>Hemostatic co-medication</b>                                                                                                                                                                                                                                 |
|-------------------|---------------|-----------------------------------------------------------------------------------------|--------------------------------------|------------------------------------|-----------------------------------------------------------------------------------------------------------------------------------------------------------------------------------------------------------------------------------------------------------------|
| <b>Patient 1*</b> | Prophylaxis   | Lumbar puncture for intrathecal chemotherapy for promyelocytic leukemia                 | PCC alone (Cumulative dose: 2750 IU) | Acute myocardial infarction        | <ul style="list-style-type: none"> <li>• Platelets (13 hrs before and 11 hrs after PCC)</li> <li>• Fibrinogen (12 hrs after PCC)</li> </ul>                                                                                                                     |
| <b>Patient 2</b>  | Treatment     | Mitral valve repair, pulmonary vein isolation, Cox-Maze procedure                       | PCC (1000 IU) and FFP                | Lacunar infarction                 | <ul style="list-style-type: none"> <li>• Vitamin K (oral)</li> <li>• Desmopressin (intravenous)</li> <li>• Cryoprecipitate</li> <li>• Platelets (45 mins before and 210 mins after PCC)</li> <li>• Red blood cells (360 mins and 405 mins after PCC)</li> </ul> |
| <b>Patient 3</b>  | Treatment     | Aortic root replacement plus hemi arch replacement plus coronary artery bypass grafting | PCC (1500 IU) and FFP                | Embolism (cerebral ischemic event) | <ul style="list-style-type: none"> <li>• Vitamin K (oral)</li> <li>• Desmopressin (intravenous)</li> <li>• Cryoprecipitate</li> <li>• Platelets (immediately before and 170 mins after PCC)</li> </ul>                                                          |
| <b>Patient 4</b>  | Treatment     | Aortic root replacement                                                                 | PCC (2000 IU) and FFP                | Cerebral ischemia                  | <ul style="list-style-type: none"> <li>• Vitamin K (oral)</li> <li>• Desmopressin (intravenous)</li> <li>• Cryoprecipitate</li> <li>• Platelets (1 min before, and 61 and 240 mins after PCC)</li> <li>• Red blood cells (34 and 45 mins after PCC)</li> </ul>  |
| <b>Patient 5</b>  | Treatment     | Aortic valve replacement plus coronary                                                  | PCC alone (1000 IU)                  | Cerebral infarction                | <ul style="list-style-type: none"> <li>• Vitamin K (oral)</li> <li>• Desmopressin (intravenous)</li> <li>• Cryoprecipitate</li> </ul>                                                                                                                           |

|                  | <b>Cohort</b> | <b>Surgical procedure(s)</b>                                        | <b>Study treatment</b> | <b>Thrombo-embolic event</b>       | <b>Hemostatic co-medication</b>                                                                                                                                                                                                                                     |
|------------------|---------------|---------------------------------------------------------------------|------------------------|------------------------------------|---------------------------------------------------------------------------------------------------------------------------------------------------------------------------------------------------------------------------------------------------------------------|
|                  |               | artery bypass grafting                                              |                        |                                    | <ul style="list-style-type: none"> <li>• Platelets (38 mins before PCC)</li> <li>• Red blood cells (4, 440 and 580 mins after PCC)</li> </ul>                                                                                                                       |
| <b>Patient 6</b> | Treatment     | Re-do sternotomy plus coronary artery bypass grafting               | PCC alone (1000 IU)    | Acute myocardial infarction        | <ul style="list-style-type: none"> <li>• Vitamin K (oral)</li> <li>• Desmopressin (intravenous)</li> <li>• Cryoprecipitate</li> <li>• Platelets (2.5 hrs after PCC)</li> <li>• Red blood cells (160, 40 and 10 mins before PCC)</li> </ul>                          |
| <b>Patient 7</b> | Treatment     | Re-do aortic valve replacement plus coronary artery bypass grafting | PCC (1000 IU) and FFP  | Embolism (cerebral ischemic event) | <ul style="list-style-type: none"> <li>• Vitamin K (oral)</li> <li>• Desmopressin (intravenous)</li> <li>• Cryoprecipitate</li> <li>• Platelets (4 mins before and 50 mins after PCC)</li> <li>• Red blood cells (115 mins before and 19 mins after PCC)</li> </ul> |

\*Patient died and the cause of death was 'relapsed acute promyelocytic leukemia and acute myocardial infarction'.
